## CORRESPONDENCE

**Mark A. Chaney, M.D.**  
 Assistant Professor of Anesthesiology  
 Department of Anesthesiology  
 Loyola University Medical Center  
 Foster G. McGaw Hospital  
 2160 South First Avenue  
 Maywood, Illinois 60153

**Reference**

1. Sheep RE, Guiney WB: Fatal cardiac tamponade: Occurrence with other complications after left internal jugular vein catheterization. *JAMA* 248:1632-1635, 1982

(Accepted for publication May 12, 1994.)

**ANNOUNCEMENT**

The American Board of Anesthesiology will administer its written examination for certification of CONTINUED DEMONSTRATION OF QUALIFICATIONS on Friday, May 5, 1995. Diplomates of the ABA who are interested in participating in the *voluntary* CDQ program may request an application by writing to the Secretary, American Board of Anesthesiology, 100 Constitution Plaza, Hartford, Connecticut 06103-1796. The deadline for receipt of completed applications in the Board office is November 15, 1994.

**ERRATUM**

Reference 4 in the Clinical Investigation by Rout *et al.* (Rout CC, Rocke DA, Levin J, Gouws E, Reddy D: A reevaluation of the role of crystalloid preload in the prevention of hypotension associated with spinal anesthesia for elective cesarean section. *ANESTHESIOLOGY* 79:262-269, 1993) contained an error. The reference should read: 4. Clark SL, Cotton DB, Pivarnik JM, Lee W, Hankins GDV, Benedetti TJ, Phelan JP: Position change and central hemodynamic profile during normal third-trimester pregnancy and post-partum. *Am J Obstet Gynecol* 164:883-887, 1991.
